# Supplementary material for: Multimodal Approach of Optical Coherence Tomography and Raman Spectroscopy Can Improve Differentiating Benign and Malignant Skin Tumors in Animal Patients
Source: MDPI journal article supplement (doi:10.3390/cancers14122820), 2022-06-07
Supplement: s1 [file s1]

**Table S1**

Information about the tumor samples collected

| #  | NUMBER OF SAMPLE | SPECIES | BREED                          | AGE    | TUMOUR              | GRADE OF MALIGNANCY           | LOCALIZATION                      |
|----|------------------|---------|--------------------------------|--------|---------------------|-------------------------------|-----------------------------------|
| 1  | 20B/0273         | dog     | chi-hua-hua                    | 3 y/o  | lipoma              | -                             | subcutis, shoulders               |
| 2  | 20B/0383         | cat     | sphynx                         | 7 y/o  | lipoma              | -                             | subcutis, hind leg                |
| 3  | 20B/0402         | cat     | mix                            | 12 y/o | fibrolipoma         | -                             | subcutis, hind leg                |
| 4  | 20B/0424         | dog     | rottweiler                     | 5 y/o  | fibrolipoma         | -                             | subcutis, front leg               |
| 5  | 20B/0509         | dog     | Labrador                       | n/a    | lipoma              | -                             | subcutis, base of tail            |
| 6  | 20B/0285         | dog     | American Staffordshire terrier | 12 y/o | lipoma              | -                             | subcutis, left axilla             |
| 7  | 20B0707          | dog     | Flandrian bouvier              | 11 y/o | lipoma, right flank | -                             | subcutis, right flank             |
| 8  | 20B0817          | dog     | rottweiler                     | 6 y/o  | lipoma              | -                             | subcutis, mammary gland           |
| 9  | 20B0831          | dog     | American Staffordshire terrier | 6 y/o  | lipoma              | -                             | subcutis, right hind leg          |
| 10 | 20B0845          | dog     | golden retriever               | 11 y/o | lipoma              | -                             | subcutis                          |
| 11 | 20B0847          | dog     | Labrador retriever             | 7 y/o  | lipoma              | -                             | subcutis, left flank              |
| 12 | 20B0879          | dog     | Jack-Russel terrier            | 6 y/o  | lipoma              | -                             | subcutis, left axillary region    |
| 13 | 20B0896          | dog     | long hairedcollie              | 7 y/o  | infiltrative lipoma | -                             | subcutis, muscles, abdominal wall |
| 14 | 20B0029          | dog     | French bulldog                 | 11 y/o | MCT                 | high grade of malignancy      | skin, preputium                   |
| 15 | 20B0055          | dog     | pug                            | 8 y/o  | MCT                 | index of mitosis 2            | subcutis, chest                   |
| 16 | 20B0066          | dog     | dachshund                      | 5 y/o  | MCT                 | high grade of malignancy      | neck                              |
| 17 | 20B0072          | dog     | Jack-Russel terrier            | 6 y/o  | MCT                 | low grade of malignancy       | skin, scrotum                     |
| 18 | 20B0135          | cat     | mix                            | 10 y/o | MCT                 | n/a                           | skin, shoulders                   |
| 19 | 20B0150          | dog     | golden retriever               | 3 y/o  | MCT                 | low grade of malignancy       | skin, shoulders                   |
| 20 | 20B0270          | dog     | Staffordshire terrier          | 9 y/o  | MCT                 | low grade of malignancy (x2); | skin, back (x2)                   |
| 21 | 20B0310          | dog     | Jack-Russel terrier            | 11 y/o | MCT                 | low grade of malignancy       | skin, scapular region             |
| 22 | 20B0318          | cat     | sphynx                         | n/a    | MCT                 | n/a                           | skin, neck                        |
| 23 | 20B0347          | dog     | cane corso                     | 5 y/o  | MCT                 | index of mitosis <1           | subcutis, frontal region          |

|    |         |     |                                |        |                              |                                   |                                       |
|----|---------|-----|--------------------------------|--------|------------------------------|-----------------------------------|---------------------------------------|
| 24 | 20B0446 | dog | retriever                      | 7 y/o  | MCT                          | low grade of malignancy; 2. grade | skin, metatarsal region               |
| 25 | 20B0516 | dog | French bulldog                 | 9 y/o  | MCT                          | low grade of malignancy           | skin, ear                             |
| 26 | 20B0544 | dog | American bulldog               | 9 y/o  | MCT                          | low grade of malignancy           | skin, hind leg                        |
| 27 | 20B0657 | cat | mix                            | 6 y/o  | MCT                          | low grade of malignancy           | skin, mammary glands                  |
| 28 | 20B0935 | dog | American Staffordshire terrier | 4 y/o  | MCT                          | low grade of malignancy           | skin, ventral part of chest           |
| 29 | 20B0016 | cat | mix                            | 12 y/o | STS                          | III                               | skin, base of tail                    |
| 30 | 20B0041 | cat | mix                            | 13 y/o | anaplastic sarcoma           | III                               | subcutis                              |
| 31 | 20B0422 | dog | cane corso                     | 8 y/o  | anaplastic sarcoma           | III                               | skin, scapular region                 |
| 32 | 20B0435 | cat | mix                            | 11 y/o | hemangiosarcoma              | n/a                               | subcutis, scapular region             |
| 33 | 20B0489 | dog | Jack-Russel terrier            | 10 y/o | STS                          | II                                | skin, elbow                           |
| 34 | 20B0493 | cat | Persian                        | 11 y/o | fibrosarcoma                 | II                                | shoulder                              |
| 35 | 20B0507 | dog | mix                            | 2 y/o  | hemangiosarcoma              |                                   | skin, subcutis, knee                  |
| 36 | 20B0543 | dog | mix                            | 10 y/o | STS                          | II                                | skin, elbow                           |
| 37 | 20B0493 | cat | Persian                        | 11 y/o | fibrosarcoma                 | II                                | shoulder                              |
| 38 | 20B0614 | dog | Labrador                       | 3 y/o  | STS                          | III                               | subcutis, elbow                       |
| 39 | 20B0621 | dog | mix                            | 12 y/o | STS                          | II                                | hind leg                              |
| 40 | 20B0623 | cat | mix                            | 11 y/o | STS                          | II                                | subcutis, chest                       |
| 41 | 20B0614 | dog | Labrador                       | 3 y/o  | STS                          | III                               | subcutis, elbow                       |
| 42 | 20B0649 | dog | mix                            | 12 y/o | STS                          | III                               | subcutis, perianal region             |
| 43 | 20B0647 | dog | mix                            | 6 y/o  | STS                          | II                                | skin, subcutis, right axillary region |
| 44 | 20B0552 | dog | Bernese shepherd               | 9 y/o  | mixed liposarcoma            | II                                | ear                                   |
| 45 | 20B0679 | cat | mix                            | 13 y/o | fibrosarcoma                 | III                               | subcutis, left hind leg               |
| 46 | 20B0662 | dog | Russian-European laika         | 10 y/o | STS                          | II                                | skin, subcutis, left anconeus region  |
| 47 | 20B0776 | cat | mix                            | 11 y/o | fibrosarcoma                 | II                                | subcutis, between shoulders           |
| 48 | 20B0782 | dog | mix                            | 8 y/o  | hemangiopericytoma           | I                                 | skin, subcutis, left elbow region     |
| 49 | 20B0835 | cat | British short hair             | 9 y/o  | fibrosarcoma                 | II                                | subcutis, between shoulders           |
| 50 | 20B0860 | cat | mix                            | 11 y/o | STS (peripheral nerve tumor) | II                                | skin, subcutis, chest region          |
| 51 | 20B0868 | cat | mix                            | 5 y/o  | fibrosarcoma                 | II                                | subcutis, caudal part of back         |
